# Supplementary material for: The Terrestrial Plastisphere: Diversity and Polymer-Colonizing Potential of Plastic-Associated Microbial Communities in Soil
Source: MDPI journal article supplement (doi:10.3390/microorganisms9091876), 2021-09-03
Supplement: s1 [file s1]

## Supplementary

MacLean et al., *The Terrestrial Plastisphere: Diversity and Polymer-colonizing Potential of Plastic-associated Microbial Communities in Soil* (2021)

**Table S1.** Alpha diversity indices (mean values) of the microbial taxa present in plastic debris (plastic) and reference soil (soil) samples. Significant P values ( $p < 0.05$ ) of the Wilcoxon rank sum test are marked with \*.

|                     | Chao1   | +/- SD  | Wilcoxon Rank sum test (P<0.05) |
|---------------------|---------|---------|---------------------------------|
| Plastic             | 2578.30 | 1404.99 | 0.53                            |
| Soil                | 2730.57 | 1451.21 |                                 |
| Site (NGK vs. Alba) |         |         | 0.47                            |

|                     | Simpson | +/- SD | Wilcoxon Rank sum test (P<0.05) |
|---------------------|---------|--------|---------------------------------|
| Plastic             | 0.970   | 0.070  | 0.012 *                         |
| Soil                | 0.980   | 0.060  |                                 |
| Site (NGK vs. Alba) |         |        | 0.014*                          |

|                     | Shannon | +/- SD | Wilcoxon Rank sum test (P<0.05) |
|---------------------|---------|--------|---------------------------------|
| Plastic             | 6.31    | 1.04   | 0.03 *                          |
| Soil                | 6.56    | 0.95   |                                 |
| Site (NGK vs. Alba) |         |        | 0.08 *                          |

|                     | Pielou | +/- SD | Wilcoxon Rank sum test (P<0.05) |
|---------------------|--------|--------|---------------------------------|
| Plastic             | 0.82   | 0.11   | 0.00053 *                       |
| Soil                | 0.85   | 0.09   |                                 |
| Site (NGK vs. Alba) |        |        | 0.021 *                         |

**Table S2.** Testing homogeneity of multivariate group variances (soil versus plastic)

|                  | Df | Sum Sq   | Mean Sq   | F value | Pr (>F) |
|------------------|----|----------|-----------|---------|---------|
| <b>Groups</b>    | 1  | 0.017161 | 0.0171615 | 2.1563  | 0.1555  |
| <b>Residuals</b> | 23 | 0.183047 | 0.0079586 |         |         |

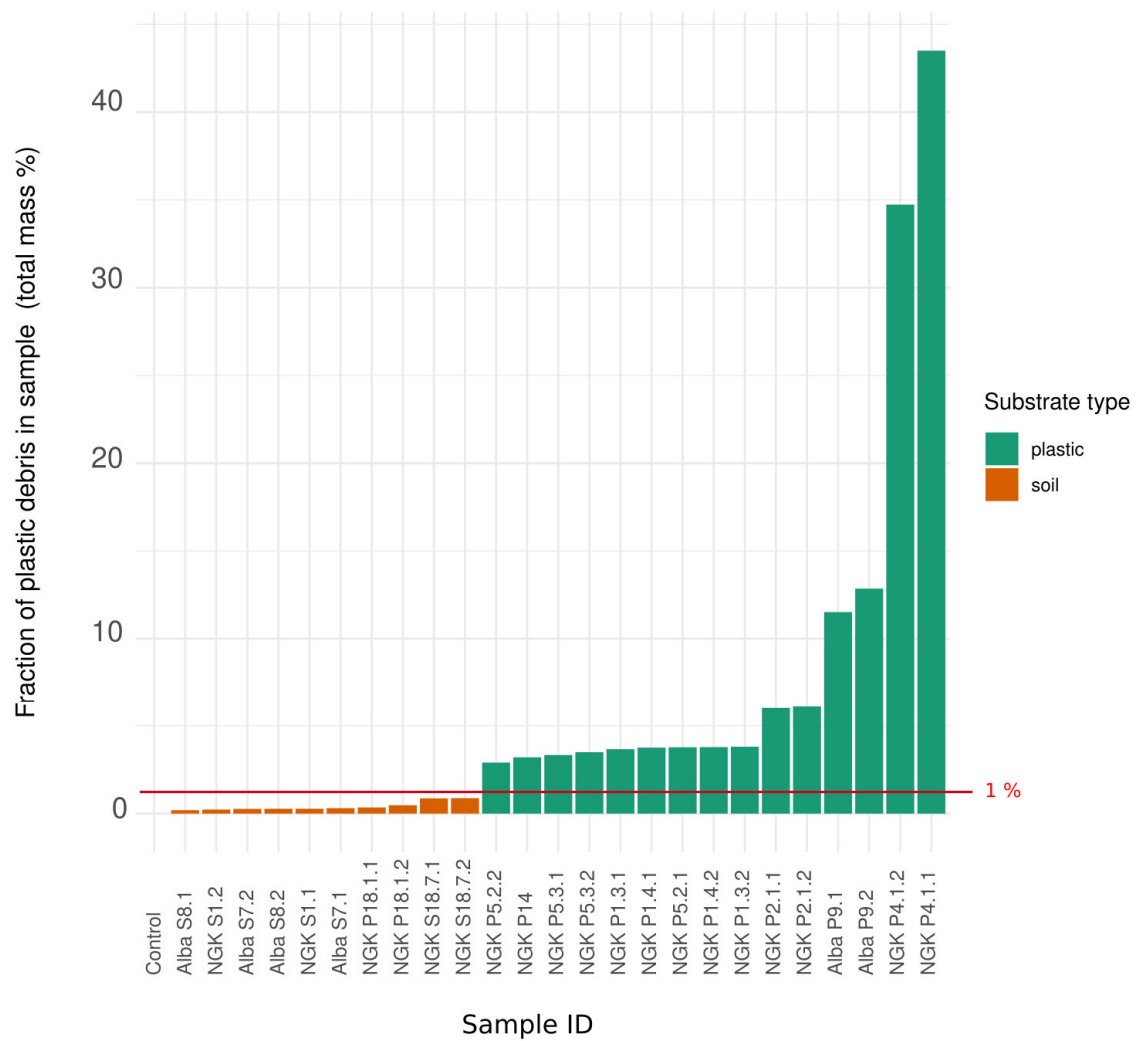

**Figure S1.** TGA quantification of the total plastic content in all sequenced samples. The content is given in mass percentage of the total (soil) material. Samples which contained less than 1% plastic debris, where considered as natural soil samples without a major influence of plastic on the soil microbial habitat.

**Table S3.** Two-way PERMANOVA (adonis)

Permutation test for adonis under reduced model  
Terms added sequentially (first to last)  
Permutation: free  
Number of permutations: 999

|                           | Df | SumOfSqs | R2             | F      | Pr(>F)    |
|---------------------------|----|----------|----------------|--------|-----------|
| <b>Sediment_type</b>      | 1  | 1.6019   | <b>0.19347</b> | 6.3992 | 0.001 *** |
| <b>Site</b>               | 1  | 0.6617   | <b>0.07992</b> | 2.6433 | 0.006 **  |
| <b>Sediment_type:Site</b> | 1  | 0.7596   | <b>0.09173</b> | 3.0342 | 0.001 *** |
| Residual                  | 21 | 5.2570   | 0.63489        |        |           |
| Total                     | 24 | 8.2802   | 1.00000        |        |           |

---  
Signif. codes: 0 ‘\*\*\*’ 0.001 ‘\*\*’ 0.01 ‘\*’ 0.05 ‘.’ 0.1 ‘ ’ 1

**Table S4.** Wilcoxon rank sum test for differences in abundances of Top50 ASV’s plastic debris versus soil

**Wilcoxon rank sum test with continuity correction**

Abundance by Substrate\_type  
W = 44750  
**p-value = 0.001347 \***  
alternative hypothesis: true location shift is not equal to 0

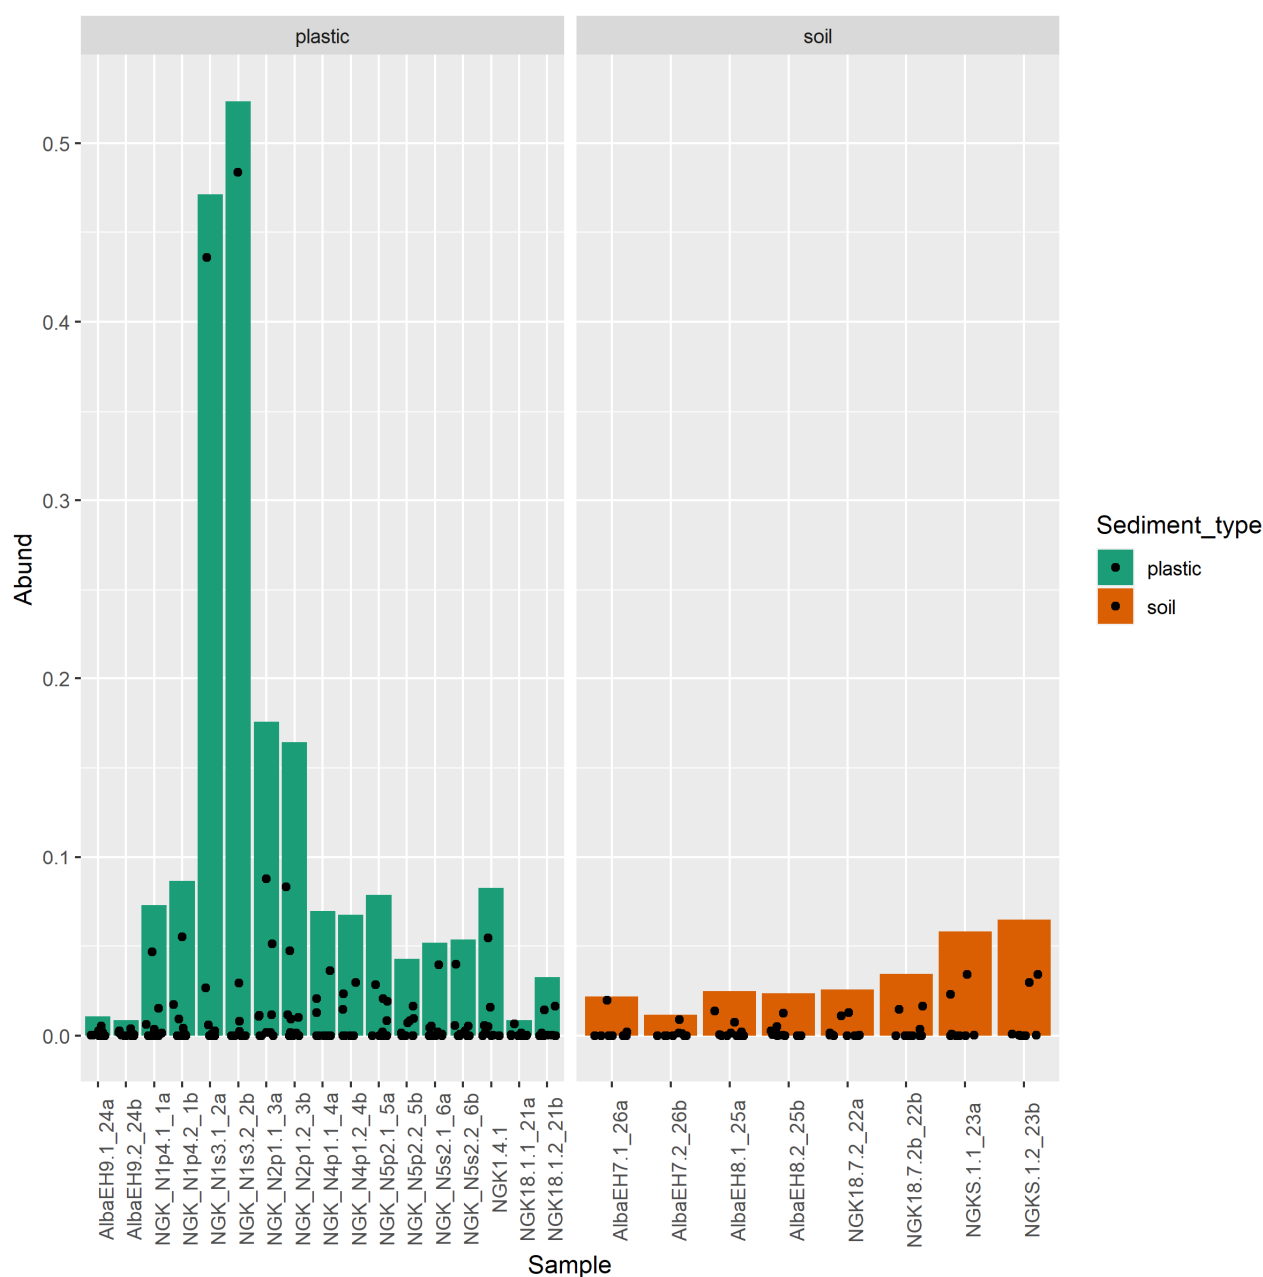

**Figure S2.** Relative abundances of top ten most abundant ASV's per sample type (plastic debris vs. soil).



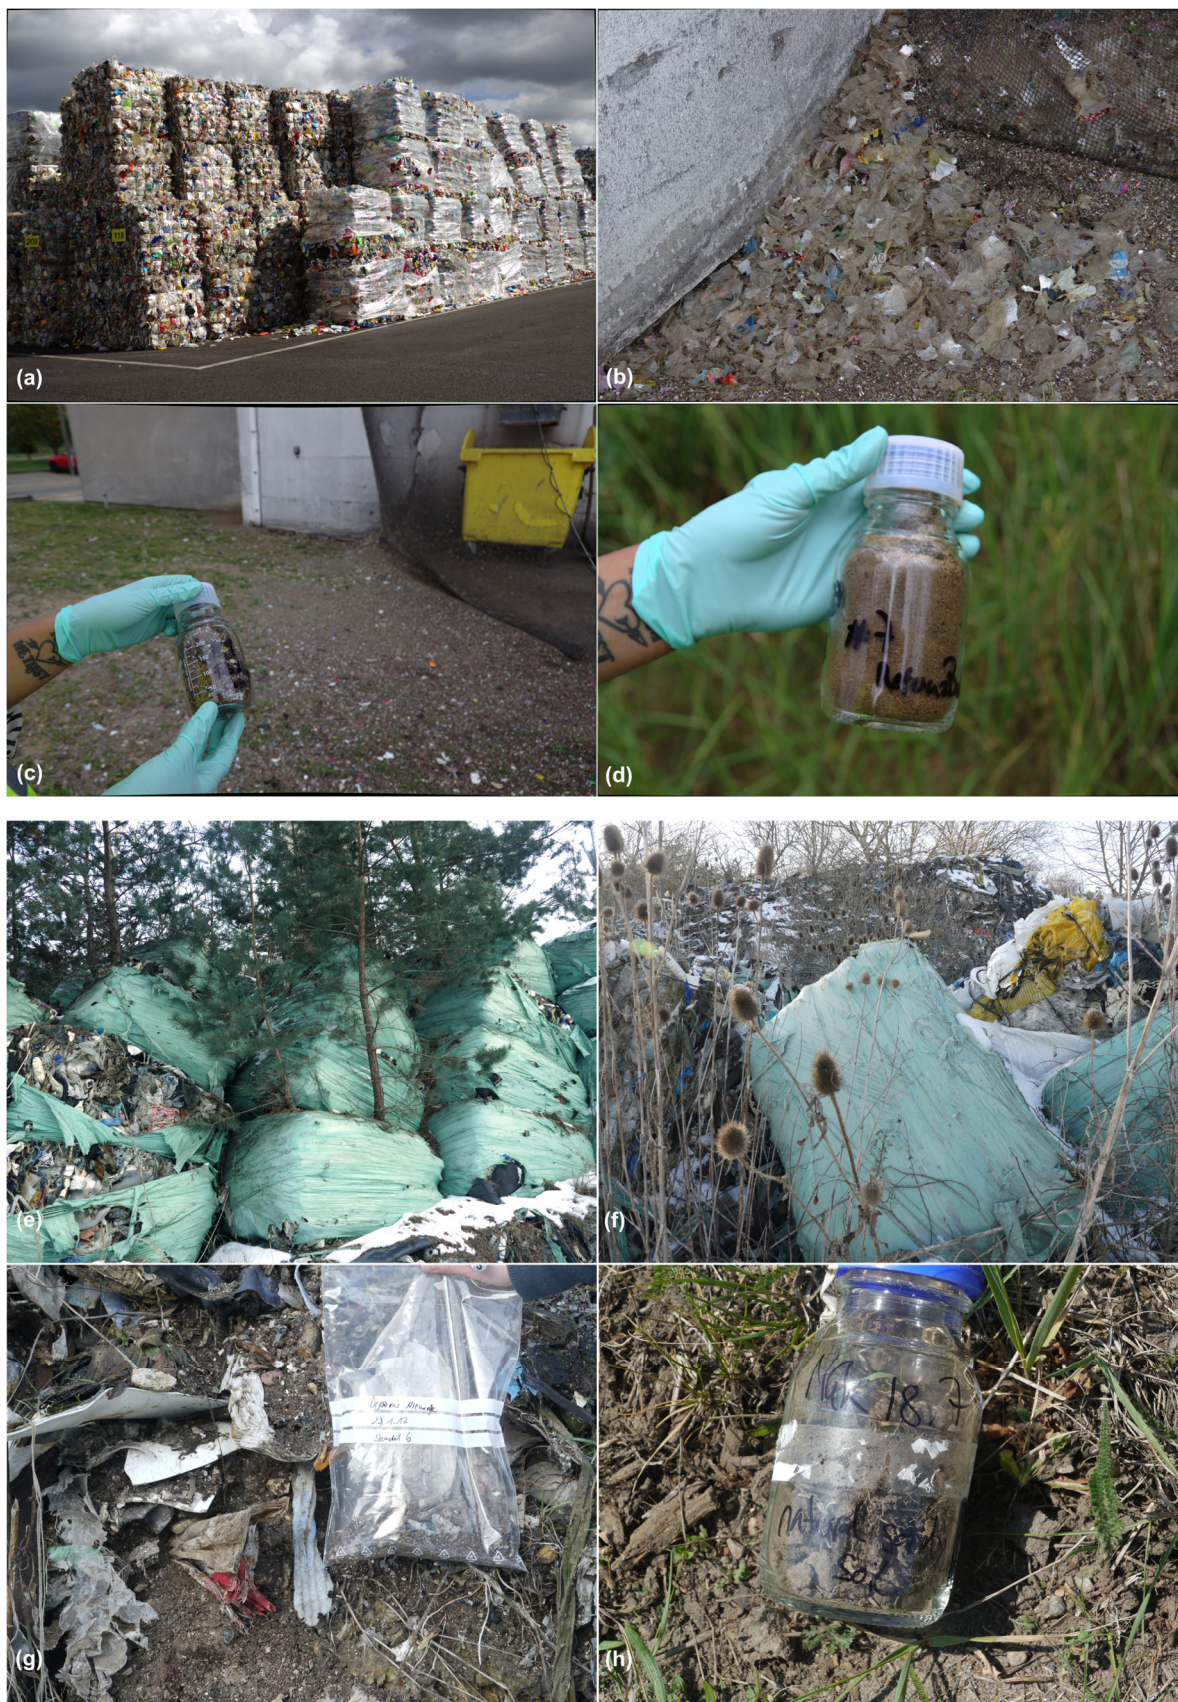

**Figure S3.** Sampling spots of plastic debris (a-c and e-g) and natural reference soil (d and h) used in our study. Images show the sampling location “Alba” (a-d): a plastic recycling factory and its surrounding terrain (d), as well as the location “Niemegek” (e-h): an abandoned plastic landfill and the adjacent meadow soil (h).



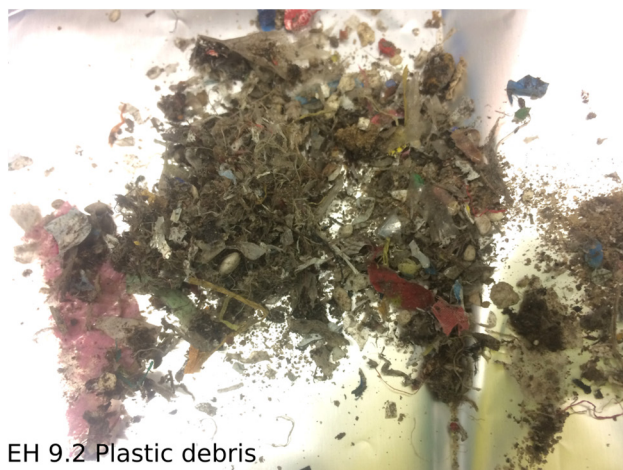

EH 9.2 Plastic debris

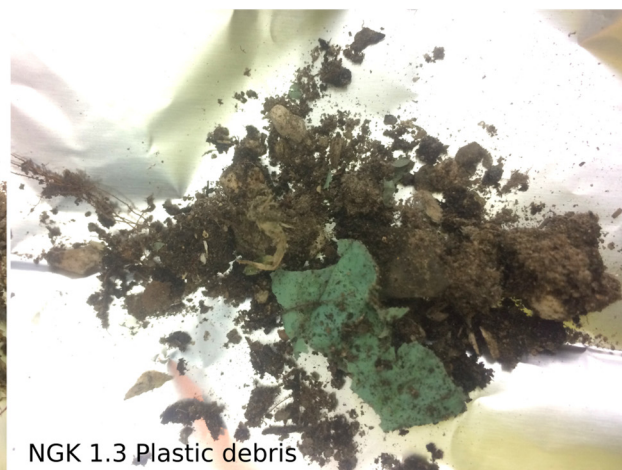

NGK 1.3 Plastic debris

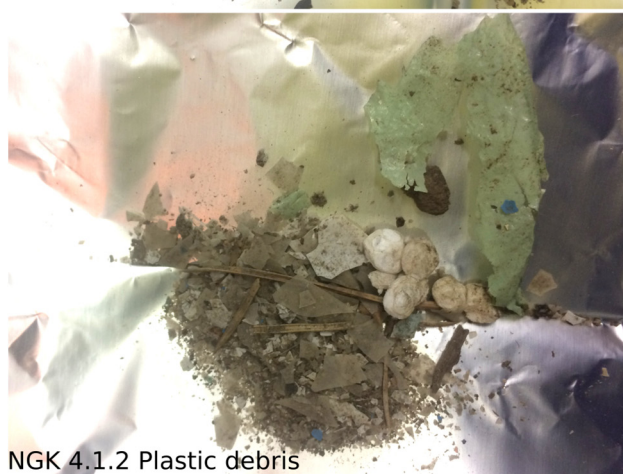

NGK 4.1.2 Plastic debris

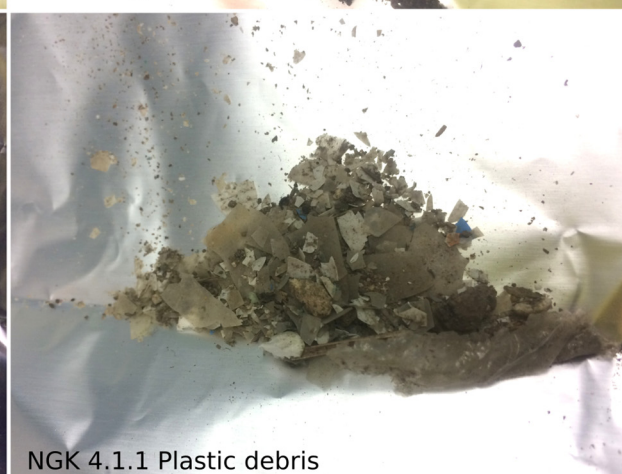

NGK 4.1.1 Plastic debris

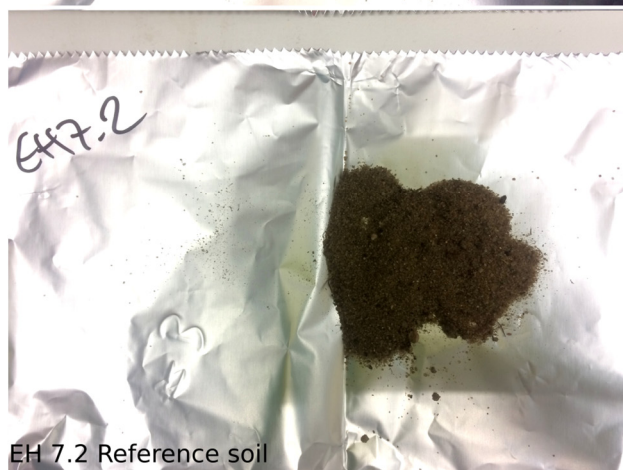

EH 7.2 Reference soil

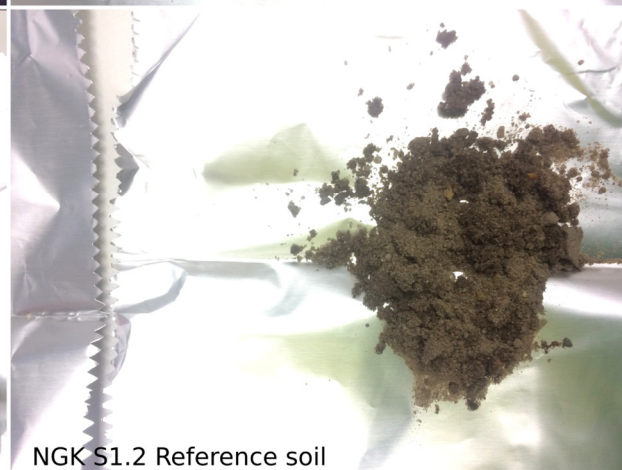

NGK S1.2 Reference soil

**Figure S4.** Sampled material used for DNA extraction and TGA plastic quantification. Soil or plastic debris was ground and homogenized using FastPrep ® Bead Tubes inside a FastPrep ® Cell disrupter for DNA extraction and the cryogenic homogenizer Retsch CryoMill for TGA measurements. Larger particles (foils) were cut prior to disruption.

**Table S5.** Average relative abundances of Top50 ASV's and corresponding genera in soil

| Abundances of top 50 ASV's (Genera) in soil |    |              |       |       |       |  |
|---------------------------------------------|----|--------------|-------|-------|-------|--|
| Genus                                       | N  | mean         | sd    | med   | se    |  |
| Pseudarthrobacter                           | 10 | 0.027        | 0.011 | 0.026 | 0.003 |  |
| Sphingomonas                                | 10 | 0.019        | 0.009 | 0.018 | 0.003 |  |
| Bradyrhizobium                              | 10 | 0.012        | 0.007 | 0.012 | 0.002 |  |
| Bacillus                                    | 10 | 0.009        | 0.006 | 0.008 | 0.002 |  |
| Microvirga                                  | 10 | 0.007        | 0.005 | 0.010 | 0.002 |  |
| Pedobacter                                  | 10 | 0.006        | 0.012 | 0.000 | 0.004 |  |
| Skermanella                                 | 10 | 0.006        | 0.006 | 0.004 | 0.002 |  |
| Pseudonocardia                              | 10 | 0.006        | 0.005 | 0.006 | 0.002 |  |
| Mycobacterium                               | 10 | 0.005        | 0.002 | 0.005 | 0.001 |  |
| Nocardioides                                | 10 | 0.004        | 0.004 | 0.003 | 0.001 |  |
| Methyloligellaceae(uncult.)                 | 10 | 0.004        | 0.003 | 0.004 | 0.001 |  |
| 67-14(uncult.)                              | 10 | 0.004        | 0.004 | 0.003 | 0.001 |  |
| Marmoricola                                 | 10 | 0.004        | 0.003 | 0.003 | 0.001 |  |
| Sphingomonadaceae(uncult.)                  | 10 | 0.004        | 0.003 | 0.003 | 0.001 |  |
| Roseiflexaceae(uncult.)                     | 10 | 0.003        | 0.006 | 0.000 | 0.002 |  |
| Gaiella                                     | 10 | 0.003        | 0.002 | 0.002 | 0.001 |  |
| Hyphomicrobium                              | 10 | 0.003        | 0.002 | 0.002 | 0.001 |  |
| Ilumatobacter                               | 10 | 0.002        | 0.002 | 0.002 | 0.001 |  |
| Pedomicrobium                               | 10 | 0.002        | 0.002 | 0.001 | 0.001 |  |
| CL500-29 marine group                       | 10 | 0.002        | 0.002 | 0.002 | 0.001 |  |
| Streptomyces                                | 10 | 0.002        | 0.002 | 0.002 | 0.001 |  |
| Nakamurella                                 | 10 | 0.002        | 0.002 | 0.002 | 0.001 |  |
| Gemmatimonadaceae(uncult.)                  | 10 | 0.002        | 0.002 | 0.001 | 0.001 |  |
| RB41                                        | 10 | 0.002        | 0.003 | 0.001 | 0.001 |  |
| MND1                                        | 10 | 0.002        | 0.003 | 0.001 | 0.001 |  |
| Average                                     |    | <b>0.006</b> |       |       |       |  |

**Table S6.** Average relative abundances of Top50 ASV's and corresponding genera in plastic debris

Abundances of top 50 ASV's (Genera) on plastic

| Genus                        | N  | mean         | sd    | med   | se    |
|------------------------------|----|--------------|-------|-------|-------|
| Tychonema CCAP 1459-11B      | 15 | 0.083        | 0.162 | 0.004 | 0.042 |
| Blastococcus                 | 15 | 0.027        | 0.021 | 0.024 | 0.005 |
| Skermanella                  | 15 | 0.012        | 0.009 | 0.012 | 0.002 |
| Rickettsiella                | 15 | 0.012        | 0.022 | 0.002 | 0.006 |
| Sphingomonadaceae(uncult.)   | 15 | 0.010        | 0.007 | 0.012 | 0.002 |
| Nocardioides                 | 15 | 0.009        | 0.005 | 0.008 | 0.001 |
| Microvirga                   | 15 | 0.008        | 0.007 | 0.008 | 0.002 |
| Streptomyces                 | 15 | 0.004        | 0.003 | 0.005 | 0.001 |
| Marmoricola                  | 15 | 0.004        | 0.002 | 0.004 | 0.001 |
| Actinomycetospora            | 15 | 0.004        | 0.003 | 0.003 | 0.001 |
| Hyphomicrobium               | 15 | 0.004        | 0.004 | 0.003 | 0.001 |
| 67-14(uncult.)               | 15 | 0.004        | 0.006 | 0.001 | 0.002 |
| Pseudarthrobacter            | 15 | 0.004        | 0.005 | 0.002 | 0.001 |
| Cellulosimicrobium           | 15 | 0.003        | 0.004 | 0.002 | 0.001 |
| Aeromicrobium                | 15 | 0.003        | 0.002 | 0.003 | 0.001 |
| Devosia                      | 15 | 0.002        | 0.002 | 0.002 | 0.001 |
| Geodermatophilus             | 15 | 0.002        | 0.006 | 0.000 | 0.002 |
| Arthrobacter                 | 15 | 0.002        | 0.002 | 0.001 | 0.001 |
| Paracoccus                   | 15 | 0.002        | 0.003 | 0.000 | 0.001 |
| Pseudonocardia               | 15 | 0.002        | 0.003 | 0.001 | 0.001 |
| Methylobacteriaceae(uncult.) | 15 | 0.002        | 0.002 | 0.002 | 0.000 |
| Rubrobacter                  | 15 | 0.002        | 0.003 | 0.001 | 0.001 |
| Methylobacterium             | 15 | 0.002        | 0.002 | 0.001 | 0.001 |
| Hyphomicrobiaceae(uncult.)   | 15 | 0.002        | 0.003 | 0.000 | 0.001 |
| Planifilum                   | 15 | 0.002        | 0.003 | 0.000 | 0.001 |
| Gemmatimonadaceae(uncult.)   | 15 | 0.002        | 0.002 | 0.000 | 0.001 |
| Aeribacillus                 | 15 | 0.002        | 0.003 | 0.000 | 0.001 |
| Rhodococcus                  | 15 | 0.002        | 0.003 | 0.000 | 0.001 |
| Average                      |    | <b>0.008</b> |       |       |       |
